# Supplementary material
Source: PubMed Central journal article supplement (PMC9528269)
Supplement: CJN.04110422SupplementaryData1.pdf [file CJN.04110422SupplementaryData1.pdf]

## Supplemental Material

### Table of Contents

**Supplemental Table 1.** Crude and Age, Sex, and Race/Ethnicity Adjusted Prevalence (95% Confidence Intervals) of Apparent Treatment Resistant Hypertension Applying Different Clinical Guidelines

**Supplemental Table 1. Crude and Age, Sex, and Race/Ethnicity Adjusted Prevalence (95% Confidence Intervals) of Apparent Treatment Resistant Hypertension Applying Different Clinical Guidelines**

|                                                                   | Kaiser Permanente Southern California |                      | Veterans Health Administration |                      |
|-------------------------------------------------------------------|---------------------------------------|----------------------|--------------------------------|----------------------|
|                                                                   | Crude Prevalence                      | Adjusted* Prevalence | Crude Prevalence               | Adjusted* Prevalence |
| <b>2017 ACC/AHA<br/>(BP Goal &lt;130/80 mm Hg)</b>                |                                       |                      |                                |                      |
| Apparent Treatment Resistant Hypertension                         | 39.5 (39.0, 39.9)                     | 39.5 (39.0, 39.9)    | 35.2 (35.0, 35.4)              | 35.2 (34.9, 35.4)    |
| Refractory Hypertension                                           | 2.6 (2.4, 2.7)                        | 2.6 (2.4, 2.7)       | 1.4 (1.4, 1.5)                 | 1.4 (1.4, 1.5)       |
| Uncontrolled Resistant Hypertension                               | 28.3 (27.9, 28.7)                     | 28.3 (27.9, 28.7)    | 29.1 (28.9, 29.3)              | 29.1 (28.9, 29.3)    |
| Controlled Resistant Hypertension                                 | 8.6 (8.4, 8.9)                        | 8.6 (8.4, 8.9)       | 4.6 (4.5, 4.7)                 | 4.6 (4.5, 4.7)       |
| Non-Apparent Treatment Resistant Hypertension                     | 60.5 (60.1, 61.0)                     | 60.5 (60.1, 61.0)    | 64.8 (64.6, 65.0)              | 64.8 (64.6, 65.0)    |
| <b>2021 KDIGO<br/>(Systolic BP Goal &lt;120 mm Hg)</b>            |                                       |                      |                                |                      |
| Apparent Treatment Resistant Hypertension                         | 48.0 (47.5, 48.5)                     | 48.0 (47.6, 48.5)    | 55.2 (55.0, 55.4)              | 55.2 (55.0, 55.4)    |
| Refractory Hypertension                                           | 3.5 (3.3, 3.6)                        | 3.5 (3.3, 3.6)       | 2.2 (2.1, 2.2)                 | 2.2 (2.1, 2.2)       |
| Uncontrolled Resistant Hypertension                               | 40.0 (39.6, 40.5)                     | 40.0 (39.6, 40.5)    | 49.4 (49.2, 49.6)              | 49.4 (49.2, 49.6)    |
| Controlled Resistant Hypertension                                 | 4.5 (4.3, 4.7)                        | 4.5 (4.3, 4.7)       | 3.6 (3.5, 3.7)                 | 3.6 (3.5, 3.7)       |
| Non-Apparent Treatment Resistant Hypertension                     | 52.0 (51.5, 52.5)                     | 52.0 (51.5, 52.5)    | 44.8 (44.6, 45.0)              | 44.8 (44.6, 45.0)    |
| <b>Historical General Population<br/>BP Goal &lt;140/90 mm Hg</b> |                                       |                      |                                |                      |
| Apparent Treatment Resistant Hypertension                         | 26.5 (26.1, 26.9)                     | 26.5 (26.1, 26.9)    | 31.5 (31.3, 31.7)              | 31.5 (31.3, 31.7)    |

|                                               |                   |                   |                   |                   |
|-----------------------------------------------|-------------------|-------------------|-------------------|-------------------|
| Refractory Hypertension                       | 1.0 (0.90, 1.08)  | 1.0 (0.90, 1.08)  | 1.0 (0.95, 1.03)  | 0.99 (0.95, 1.03) |
| Uncontrolled Resistant Hypertension           | 10.7 (10.4, 11.0) | 10.7 (10.4, 11.0) | 20.6 (20.4, 20.8) | 20.6 (20.5, 20.8) |
| Controlled Resistant Hypertension             | 14.8 (14.5, 15.2) | 14.8 (14.5, 15.2) | 9.9 (9.8, 10.0)   | 9.9 (9.8, 10.0)   |
| Non-Apparent Treatment Resistant Hypertension | 73.5 (73.1, 73.9) | 73.5 (73.1, 73.9) | 68.5 (68.3, 68.7) | 68.5 (68.3, 68.7) |

Abbreviations: 2017 ACC/AHA = 2017 American College of Cardiology/American Heart Association; 2021 KDIGO = the 2021 Kidney Disease: Improving Global Outcomes. \*Age category (<65, 65-74.9, 75-84.9, >85 years), sex, and race/ethnicity (Non-Hispanic White, Hispanic, Non-Hispanic Black, Asian/Pacific Islander, Other races) were adjusted using multivariable logistic regression. Average predicted probabilities from the fitted model were obtained from *margins* command using Stata.
